# Supplementary material for: Screening of red phosphorus supported transition metal single-atom catalysts for efficient photocatalytic water splitting H2 generation
Source: Royal Society of Chemistry journal article supplement (doi:10.1039/d4qi01608d), 2024-01-01
Supplement: d4qi01608d1.pdf [file d4qi01608d1.pdf]

## Supporting Information for

### Screening of Red Phosphorus Supported Transition Metal Single-atom Catalysts for Efficient Photocatalytic Water Splitting H<sub>2</sub> Generation

Lu Lu,<sup>[a]</sup> Mingzi Sun,<sup>[a]</sup> Tong Wu,<sup>[a]</sup> Qiuyang Lu,<sup>[a]</sup> Baian Chen,<sup>[a]</sup> Cheuk Hei Chan,<sup>[a]</sup>  
Hon Ho Wong,<sup>[a]</sup> Bolong Huang\*,<sup>[a][b]</sup>

<sup>[a]</sup>Department of Applied Biology and Chemical Technology, The Hong Kong Polytechnic University, Hung Hom, Kowloon, Hong Kong SAR, China

<sup>[b]</sup>Research Centre for Carbon-Strategic Catalysis, The Hong Kong Polytechnic University, Hung Hom, Kowloon, Hong Kong SAR, China

\*E-mail: [bhuang@polyu.edu.hk](mailto:bhuang@polyu.edu.hk) (B. H.)

## Calculation Setup

A comprehensive computational simulation has been taken on pristine red phosphorus (RP) and twenty-nine kinds of single-atom (SA) transition metal (TM) anchored TM-RP catalysts under density functional theory (DFT) with CASTEP code.<sup>1</sup> The GGA-PBE<sup>2-4</sup> functional, LBFGS algorithm, and ultrasoft pseudopotentials have been set as basic computational parameters for all the geometry optimization and single-point energy calculation throughout the work. For the solution of the Kohn-Sham (KS) equation, we apply the ensemble DFT approach of Marzari et al. for the warranty of electronic minimization as well as convergence requirements.<sup>5</sup> The cutoff energy in water adsorption ( $H_2O_{ad}$ ) models has been set as 380 eV for pristine-RP and TM-RP. The k-point set is  $2 \times 2 \times 1$  for all the energy minimizations, and the SCF tolerance is  $5.0 \times 10^{-7}$  eV/atom. The detailed convergence tolerance minimizer parameters have been indicated as follows: the energy tolerance is  $5.0 \times 10^{-6}$  eV/atom; the Max. Hellmann-Feynman force per atom is set as 0.01 eV/Å; the Max. stress is 0.02 GPa; and the Max. displacement is  $5.0 \times 10^{-4}$  Å. The RP (001) surface is cut from fully relaxed bulk Hittorf's phosphorus,<sup>6</sup> with two monolayers containing 84 P atoms, resulting in a lattice parameter of 9.27 Å in length-A orientation and 9.21 Å in length-B orientation respectively. The vacuum thickness has been set as 20 Å, with a length of 40.95 Å obtained in C-orientation. The top view of pristine-RP and twenty-nine different kinds of TM atom anchored on RP (001) surfaces has been indicated in **Fig. S1**. During the  $H_2O_{ad}$  and H-adsorption ( $H_{ad}$ ) process, the single-atom catalyst (SAC) surface has been constrained to focus on the key behaviors and adsorption properties of adsorbates. The  $H_{ad}$  energy ( $\Delta E_H$ ) has been calculated through the following equation<sup>7, 8</sup>:

$$\Delta E_H = E_{H^*} - E^* - \frac{1}{2}E(H_2) \quad (1)$$

in which \* represents the pristine RP surface without adsorption, and  $H^*$  indicates the surface adsorbed with H.

The Gibbs free energy change ( $\Delta G_{H^*}$ ) between the gas phase and the adsorbed state of hydrogen has been adopted as the descriptor for evaluating HER energy barriers. As proposed by Nørskov et al,  $\Delta G_{H^*}$  can be calculated by the following equation:

$$\Delta G_{H^*} = \Delta E_{H^*} + \Delta E_{ZPE} - T\Delta S_H \quad (2)$$

in which  $\Delta E_{H^*}$  indicates the chemisorption energy,  $\Delta E_{ZPE}$  represents the zero point energy change, and  $\Delta S_H$  represents the entropy change of H adsorption.<sup>7</sup> The H-adsorption energies ( $\Delta E_{H^*}$ ) on different TM-RP facets are obtained via the following equation:

$$\Delta E_{H^*} = E_{(slab + H^*)} - E_{slab} - \frac{1}{2}E_{H_2} \quad (3)$$

where  $E_{(slab + H^*)}$  means the total energy of the H-adsorption slab,  $E_{slab}$  indicates the energy of the pristine slab, and  $E_{H_2}$  represents the energy of  $H_2$ . The zero point energy can be calculated as below:

$$\Delta E_{ZPE} = ZPE_{H^*} - \frac{1}{2}ZPE_{H_2} \quad (4)$$

in which  $ZPE_{H^*}$  and  $ZPE_{H_2}$  are zero-point energies of H in adsorbed and gas state, respectively. The reported value of  $\Delta E_{ZPE}$  is 0.04 eV,<sup>7</sup> and it has been considered as a reference value for all the TM-RP models calculated in this work. Since the vibrational

entropy of hydrogen in the adsorbed phase ( $S_{H^*}$ ) is quite small, the  $\Delta S_H$  can be calculated as follows:

$$\Delta S_H = S_{H^*} - \frac{1}{2}S_{H_2} \approx -\frac{1}{2}S_{H_2} \quad (5)$$

Herein,  $S_{H_2}$  stands for the entropy of hydrogen in the gas phase under standard state. At room temperature ( $T = 298 \text{ K}$ ), the  $TS_{H_2}$  of gaseous  $H_2$  is  $0.41 \text{ eV}$ ,<sup>9</sup> and the  $T\Delta S_H$  is calculated to be  $-0.204 \text{ eV}$ .<sup>10, 11</sup> As a result,  $\Delta G_{H^*}$  can be calculated as:

$$\Delta G_{H^*} = \Delta E_{H^*} + 0.24 \text{ eV} \quad (6)$$

The formation energy ( $E_{\text{Form}}$ ) values of TM-RPs can be calculated from the following Equation:

$$E_{\text{Form}} = E_{\text{TM-RP}} - E_{\text{TM}} - E_{\text{RP}} \quad (7)$$

in which the  $E_{\text{TM-RP}}$  is the total energy of each TM-RP SAC model,  $E_{\text{TM}}$  is the energy of one SA-TM cut from the configuration of its corresponding SAC model, and  $E_{\text{RP}}$  is the total energy of the substrate RP surface.

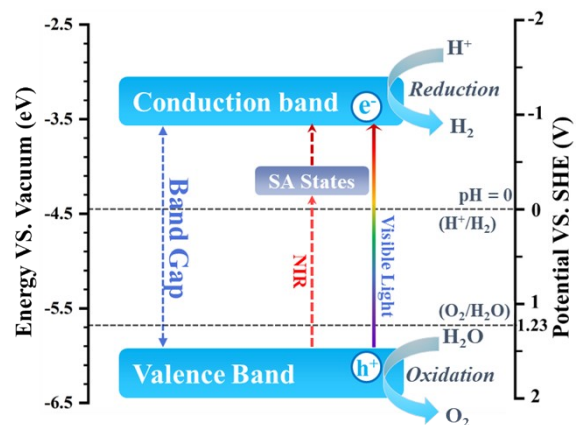

**Figure S1.** The schematic diagram of electronic modulation induced by the anchored SA-TMs.

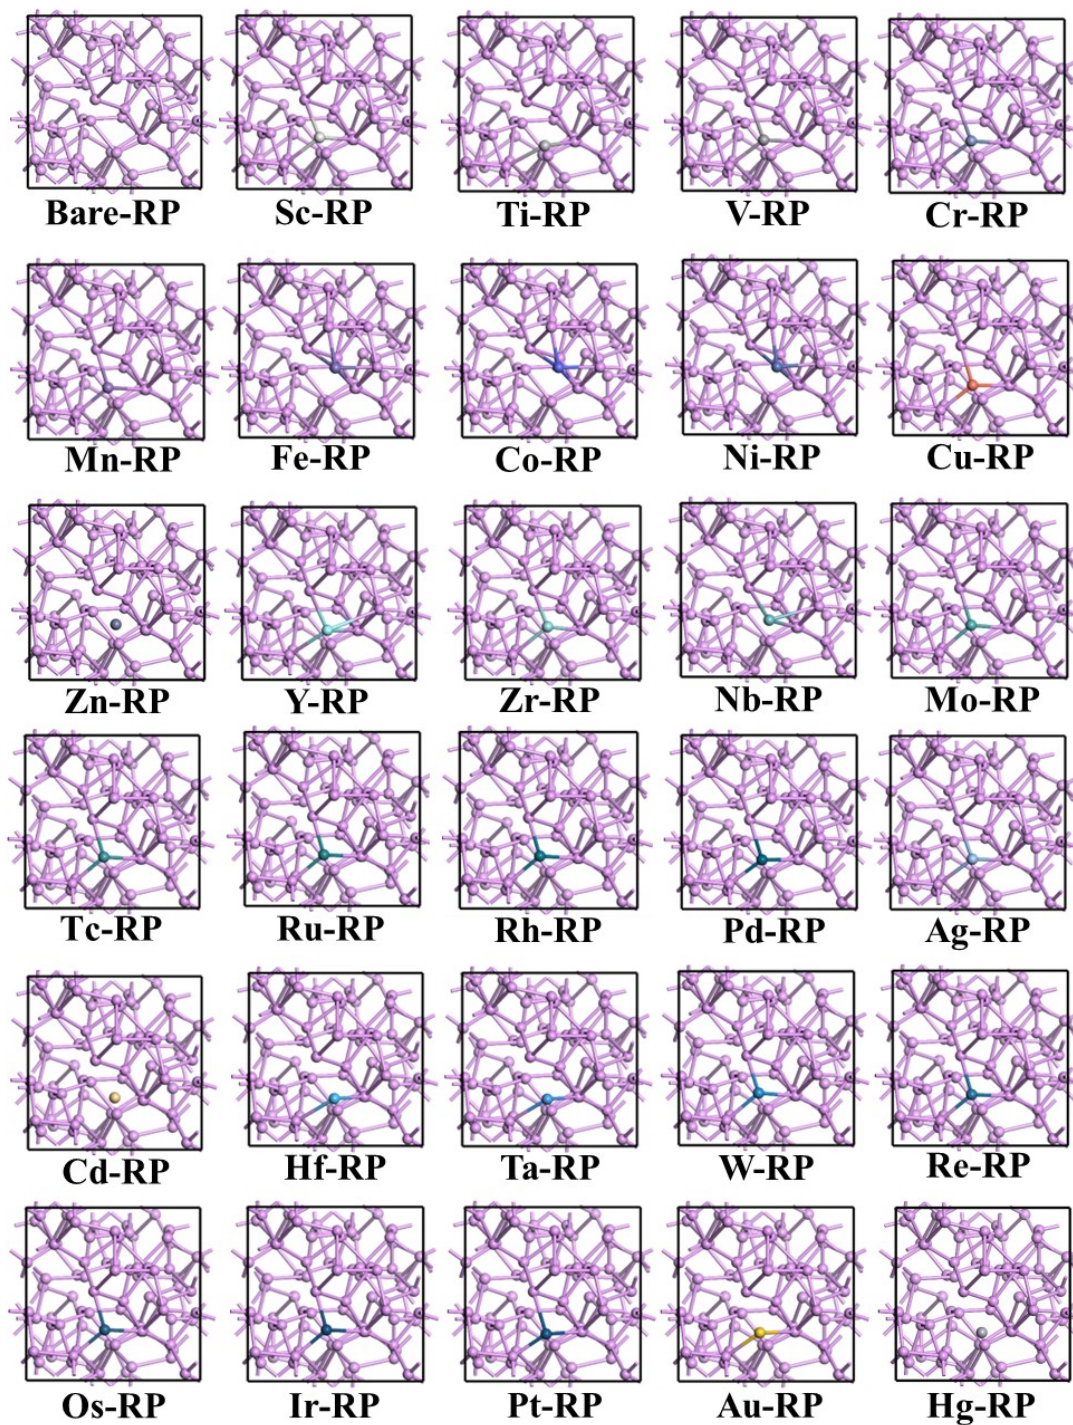

**Figure S2.** Configurations of pristine-RP and twenty-nine kinds of anchored active TM atoms on RP (001) surface.

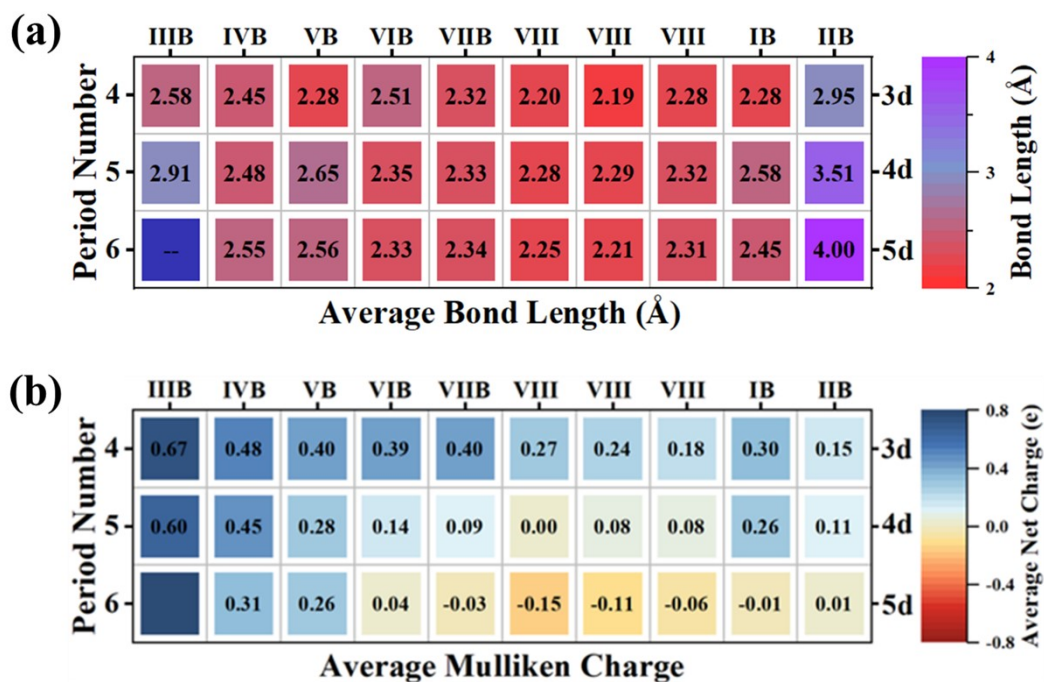

**Figure S3.** (a) The average bond length (TMs coordinated to surrounding P atoms) of twenty-nine active SA-TM atom types anchored on the RP (001) surface. (b) Mulliken charge analysis of twenty-nine active SA-TM atom types that anchored on RP (001) surface.

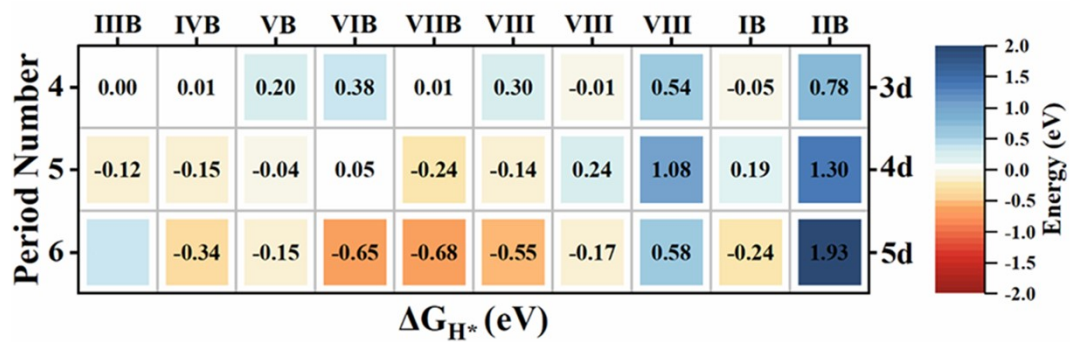

**Figure S4.** The mapping of  $\Delta G_{H^*}$  for active TM sites for twenty-nine kinds of TM-RP SACs.

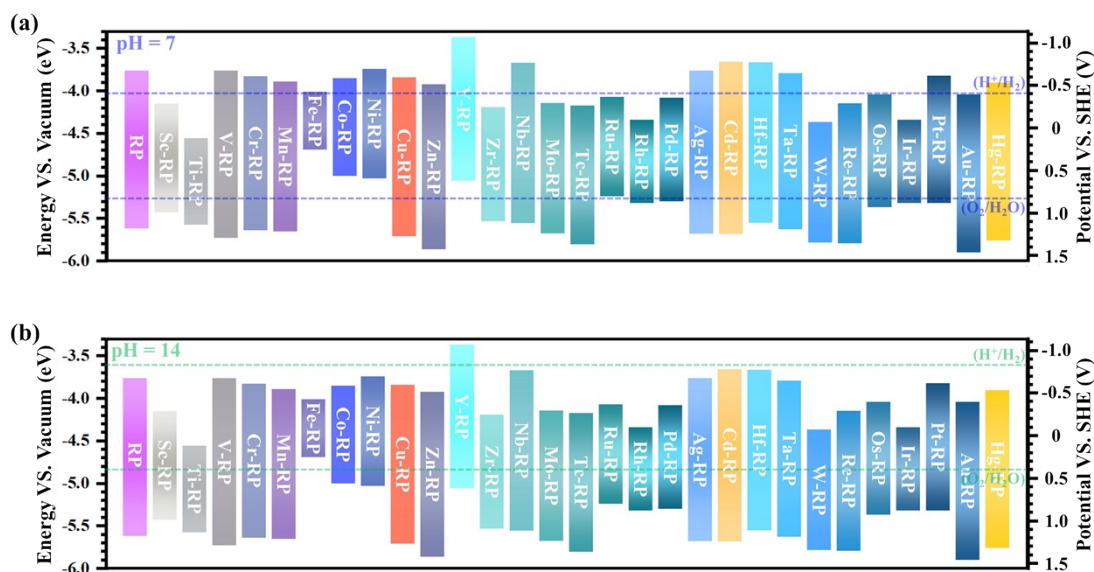

**Figure S5.** Band structure alignments in the scale of vacuum level (left) and SHE (right) for pristine-RP and twenty-nine types of TM-RP SACs. The blue and green dashed lines in the horizontal direction represent the redox potentials of water ( $H^+/H_2$  and  $O_2/H_2O$ ) at  $pH = 7$  (a) and  $pH = 14$  (b) respectively.

The pH change will alter the standard redox potentials of water based on Nernst equations:

$$E^{\text{HER}}(H^+/H_2) = -4.44 \text{ eV} + pH \times 0.059 \text{ eV} \quad (8)$$

$$E^{\text{OER}}(O_2/H_2O) = -5.67 \text{ eV} + pH \times 0.059 \text{ eV} \quad (9)$$

As a result, the photocatalytic reaction tendency for both HER and OER can be regulated via pH control. With the increase in pH, both the potential levels of  $H^+/H_2$  and  $O_2/H_2O$  will move up, leading to a driving force decrease in HER and a corresponding increase in OER. That is, the HER and OER reaction tendency can be balanced for overall photocatalytic water splitting with the variation of pH. For instance, when  $pH = 7$ , the thermodynamic HER and OER driving force of pristine-RP, V-RP, Cr-RP, Nb-RP, Ag-RP, Cd-RP, Hf-RP, and Ta-RP are in similar values, exhibiting their great potential for overall water splitting at neutral condition. While in the highly alkaline conditions ( $pH = 14$ ), except Y-RP and La-RP, pristine-RP and most TM-RP SAC candidates will lose their HER capacity from the perspective of thermodynamics.



## References

1. S. J. Clark, M. D. Segall, C. J. Pickard, P. J. Hasnip, M. I. J. Probert, K. Refson and M. C. Payne, *Zeitschrift für Kristallographie - Crystalline Materials*, 2005, **220**, 567-570.
2. J. P. Perdew, K. Burke and M. Ernzerhof, *Phys. Rev. Lett.*, 1996, **77**, 3865-3868.
3. P. J. Hasnip and C. J. Pickard, *Computer Physics Communications*, 2006, **174**, 24-29.
4. J. P. Perdew, J. A. Chevary, S. H. Vosko, K. A. Jackson, M. R. Pederson, D. J. Singh and C. Fiolhais, *Physical Review B*, 1992, **46**, 6671-6687.
5. N. Marzari, D. Vanderbilt and M. C. Payne, *Physical Review Letters*, 1997, **79**, 1337-1340.
6. H. Thurn and H. Krebs, *Angewandte Chemie*, 1966, **78**, 1101-1102.
7. J. K. Nørskov, T. Bligaard, A. Logadottir, J. R. Kitchin, J. G. Chen, S. Pandalov and U. Stimming, *Journal of The Electrochemical Society*, 2005, **152**, J23-J26.
8. U. Kerketta, A. B. Tesler and P. Schmuki, *Catalysts*, 2022, **12**, 1223.
9. Y. Liu, G. Yu, G.-D. Li, Y. Sun, T. Asefa, W. Chen and X. Zou, *Angewandte Chemie International Edition*, 2015, **54**, 10752-10757.
10. N. N. T. Pham, S. G. Kang, H.-J. Kim, C. Pak, B. Han and S. G. Lee, *Applied Surface Science*, 2021, **537**, 147894.
11. Z. Liang, X. Zhong, T. Li, M. Chen and G. Feng, *ChemElectroChem*, 2019, **6**, 260-267.
